# Supplementary material
Source: publisher figshare collection journal article supplement (https://asha.figshare.com/articles/dataset/_/5848056)
Supplement: Supplementary file 1 [file 1]

**Supplemental Material S2. Speech and language scores by participant.**

| ID    | Age | Group  | GFTA-2 percentile | Concepts and Following Directions (Scaled Score) | Recalling Sentences (Scaled Score) | Formulating Sentences (Scaled Score) | Core Language Score |
|-------|-----|--------|-------------------|--------------------------------------------------|------------------------------------|--------------------------------------|---------------------|
| GP001 | 86  | CAS    | 10                | 12                                               | 13                                 | 13                                   | 115                 |
| GP003 | 103 | CAS    | 1                 | 10                                               | 9                                  | 8                                    | 98                  |
| GP004 | 164 | CAS    | 2                 | 15*                                              | 13                                 | 15                                   | 133                 |
| GP008 | 120 | CAS    | 3                 | 14                                               | 8                                  | 10                                   | 111                 |
| GP009 | 116 | CAS    | 3                 | 13                                               | 6                                  | 12                                   | 99                  |
| GP015 | 207 | CAS    | 1                 | 10*                                              | 3                                  | 12                                   | 98                  |
|       |     |        |                   |                                                  | <i>CELF-P</i> given                |                                      |                     |
|       |     |        |                   |                                                  | Expressive Vocab = 7               |                                      |                     |
| GP031 | 55  | CAS    | 15                | 7                                                | Word Structure Raw = 1             |                                      | 90                  |
| GP005 | 108 | CAS+LI | 2                 | 13                                               | 6                                  | 5                                    | 85                  |
| GP017 | 64  | CAS+LI | 6                 | 6                                                | 5                                  | 5                                    | 73                  |
| GP022 | 114 | CAS+LI | 2                 | 3                                                | 5                                  | 11                                   | 78                  |
| GP046 | 104 | CAS+LI | 3                 | 10                                               | 6                                  | 6                                    | 82                  |
| GP061 | 148 | CAS+LI | 1                 | 1                                                | 1                                  | 1                                    | 44                  |
| GP069 | 147 | CAS+LI | 2                 | 3                                                | 1                                  | 2                                    | 50                  |
| GP045 | 124 | LI     | 36                | 6                                                | 4                                  | 4                                    | 70                  |
| GP047 | 121 | LI     | 34                | 4                                                | 6                                  | 6                                    | 84                  |
| GP073 | 121 | LI     | 36                | 5                                                | 2                                  | 2                                    | 64                  |
| GP075 | 136 | LI     | 34                | 4                                                | 7                                  | 10                                   | 82                  |
| GP078 | 144 | LI     | 19                | 4                                                | 1                                  | 4                                    | 58                  |
| GP082 | 117 | LI     | 37                | 4                                                | 5                                  | 10                                   | 78                  |

## Supplemental Material S2. Speech and language scores by participant.

| ID    | Age | Group | GFTA-2 percentile | Concepts and Following Directions (Scaled Score) | Recalling Sentences (Scaled Score) | Formulating Sentences (Scaled Score) | Core Language Score |
|-------|-----|-------|-------------------|--------------------------------------------------|------------------------------------|--------------------------------------|---------------------|
| GP091 | 92  | LI    | 56                | 7                                                | 7                                  | 8                                    | 87                  |
| GP026 | 132 | TD    | 32                | 11                                               | 11                                 | 11                                   | 106                 |
| GP027 | 104 | TD    | 23                | 11                                               | 11                                 | 13                                   | 109                 |
| GP034 | 135 | TD    | 21                | 12                                               | 15                                 | 13                                   | 124                 |
| GP035 | 212 | TD    | 12                | 14*                                              | 7                                  | 11                                   | 109                 |
| GP036 | 105 | TD    | 44                | 12                                               | 9                                  | 8                                    | 93                  |
| GP044 | 151 | TD    | 27                | 13                                               | 16                                 | 16                                   | 136                 |
| KC103 | 99  | TD    | 30                | <i>CELF Screener - PASS</i>                      |                                    |                                      |                     |
| KC104 | 94  | TD    | 54                | <i>CELF Screener - PASS</i>                      |                                    |                                      |                     |
| KC114 | 94  | TD    | 54                | <i>CELF Screener - PASS</i>                      |                                    |                                      |                     |
| KC119 | 103 | TD    | 47                | <i>CELF Screener - PASS</i>                      |                                    |                                      |                     |
| KC123 | 110 | TD    | 43                | <i>CELF Screener - PASS</i>                      |                                    |                                      |                     |
| KC127 | 115 | TD    | 65                | <i>CELF Screener - PASS</i>                      |                                    |                                      |                     |
| KC140 | 108 | TD    | 43                | <i>CELF Screener - PASS</i>                      |                                    |                                      |                     |
| KC150 | 98  | TD    | 52                | <i>CELF Screener - PASS</i>                      |                                    |                                      |                     |
| KC161 | 96  | TD    | 52                | <i>CELF Screener - PASS</i>                      |                                    |                                      |                     |
| GP016 | 119 | SD    | 1                 | 13                                               | 7                                  | 13                                   | 97                  |
| GP023 | 100 | SD    | 5                 | 9                                                | 8                                  | 10                                   | 93                  |
| GP024 | 105 | SD    | 1                 | 10                                               | 9                                  | 6                                    | 94                  |

## Supplemental Material S2. Speech and language scores by participant.

| ID    | Age | Group | GFTA-2 percentile | Concepts and Following Directions (Scaled Score) | Recalling Sentences (Scaled Score) | Formulating Sentences (Scaled Score) | Core Language Score |
|-------|-----|-------|-------------------|--------------------------------------------------|------------------------------------|--------------------------------------|---------------------|
| GP063 | 76  | SD    | 5                 | 7                                                | 8                                  | 7                                    | 88                  |
| GP068 | 85  | SD    | 8                 | 9                                                | 9                                  | 13                                   | 100                 |
| GP070 | 117 | SD    | 1                 | 12                                               | 17                                 | 14                                   | 129                 |
| GP072 | 113 | SD    | 1                 | 13                                               | 13                                 | 11                                   | 121                 |
| GP079 | 105 | SD    | 2                 | 13                                               | 14                                 | 15                                   | 123                 |
| KC108 | 96  | SD    | 14                | <i>CELF Screener - PASS</i>                      |                                    |                                      |                     |
| KC139 | 95  | SD    | 1                 | <i>CELF Screener - PASS</i>                      |                                    |                                      |                     |
| KC142 | 109 | SD    | 1                 | <i>CELF Screener - PASS</i>                      |                                    |                                      |                     |
| KC154 | 98  | SD    | 2                 | <i>CELF Screener - PASS</i>                      |                                    |                                      |                     |

*Note.* CAS = children with childhood apraxia of speech (CAS) without language impairment; CAS+LI = children with CAS with language impairment; LI = children with language impairment; SD = children with speech delay; TD = typically developing children.

\*Score for Word Definitions subtest is reported instead of score for Concepts and Following Directions due to age parameters on test.
