# Supplementary material
Source: publisher figshare collection journal article supplement (https://asha.figshare.com/articles/dataset/_/5848056)
Supplement: Supplementary file 2 [file 1]

**Supplemental Material S1.** Presence of childhood apraxia of speech (CAS) features for individual participants.

| ID    | Group  | Vowel error | Consonant distortion | Stress error | Syllable segregation | Groping | Intrusive schwa | Voicing error | Slow rate | Difficulty with multisyllabic words | Resonance disturbance | Difficulty initiating articulation | Total |
|-------|--------|-------------|----------------------|--------------|----------------------|---------|-----------------|---------------|-----------|-------------------------------------|-----------------------|------------------------------------|-------|
| GP001 | CAS    | 1           | 1                    | 1            | 1                    | 0       | 1               | 1             | 1         | 1                                   | 0                     | 0                                  | 8     |
| GP003 | CAS    | 1           | 1                    | 1            | 0                    | 0       | 1               | 1             | 1         | 1                                   | 1                     | 1                                  | 9     |
| GP004 | CAS    | 1           | 1                    | 0            | 1                    | 0       | 1               | 1             | 0         | 0                                   | 0                     | 0                                  | 5     |
| GP008 | CAS    | 1           | 0                    | 1            | 1                    | 0       | 1               | 1             | 0         | 0                                   | 1                     | 0                                  | 6     |
| GP009 | CAS    | 1           | 1                    | 0            | 1                    | 0       | 0               | 1             | 0         | 0                                   | 0                     | 1                                  | 5     |
| GP015 | CAS    | 1           | 1                    | 1            | 1                    | 0       | 1               | 1             | 0         | 1                                   | 0                     | 1                                  | 8     |
| GP031 | CAS    | 1           | 1                    | 1            | 1                    | 0       | 1               | 1             | 0         | 1                                   | 0                     | 1                                  | 8     |
| GP005 | CAS+LI | 1           | 1                    | 1            | 0                    | 0       | 1               | 1             | 0         | 0                                   | 1                     | 1                                  | 7     |
| GP017 | CAS+LI | 1           | 1                    | 0            | 1                    | 0       | 0               | 1             | 0         | 1                                   | 0                     | 0                                  | 5     |
| GP022 | CAS+LI | 1           | 1                    | 0            | 1                    | 0       | 1               | 1             | 0         | 0                                   | 0                     | 0                                  | 5     |
| GP046 | CAS+LI | 1           | 1                    | 0            | 0                    | 0       | 1               | 1             | 1         | 1                                   | 0                     | 0                                  | 6     |
| GP061 | CAS+LI | 1           | 1                    | 1            | 1                    | 0       | 1               | 0             | 0         | 0                                   | 1                     | 1                                  | 7     |
| GP069 | CAS+LI | 1           | 1                    | 1            | 0                    | 0       | 0               | 1             | 1         | 0                                   | 1                     | 1                                  | 7     |
| GP045 | LI     | 0           | 1                    | 0            | 0                    | 0       | 0               | 0             | 0         | 0                                   | 0                     | 0                                  | 1     |
| GP047 | LI     | 1           | 0                    | 0            | 0                    | 0       | 0               | 1             | 0         | 0                                   | 0                     | 0                                  | 2     |
| GP073 | LI     | 0           | 0                    | 1            | 0                    | 0       | 1               | 1             | 0         | 0                                   | 0                     | 0                                  | 3     |
| GP075 | LI     | 0           | 0                    | 0            | 0                    | 0       | 0               | 0             | 0         | 0                                   | 0                     | 0                                  | 0     |
| GP078 | LI     | 0           | 0                    | 0            | 0                    | 0       | 0               | 0             | 0         | 0                                   | 1                     | 0                                  | 1     |
| GP082 | LI     | 0           | 0                    | 0            | 0                    | 0       | 0               | 1             | 0         | 0                                   | 1                     | 0                                  | 2     |
| GP026 | TD     | 1           | 1                    | 0            | 0                    | 0       | 0               | 0             | 0         | 0                                   | 0                     | 0                                  | 2     |
| GP027 | TD     | 0           | 1                    | 1            | 1                    | 0       | 0               | 0             | 0         | 0                                   | 0                     | 0                                  | 3     |
| GP034 | TD     | 0           | 0                    | 0            | 0                    | 0       | 0               | 0             | 0         | 0                                   | 0                     | 0                                  | 0     |
| GP035 | TD     | 0           | 0                    | 0            | 0                    | 0       | 0               | 0             | 0         | 0                                   | 0                     | 0                                  | 0     |
| GP036 | TD     | 0           | 1                    | 0            | 0                    | 0       | 1               | 0             | 0         | 0                                   | 0                     | 0                                  | 2     |
| GP044 | TD     | 0           | 1                    | 0            | 0                    | 0       | 1               | 0             | 0         | 0                                   | 0                     | 0                                  | 2     |
| KC103 | TD     | 1           | 0                    | 0            | 0                    | 0       | 0               | 0             | 0         | 0                                   | 0                     | 0                                  | 1     |
| KC104 | TD     | 0           | 0                    | 0            | 0                    | 0       | 0               | 0             | 0         | 0                                   | 0                     | 0                                  | 0     |
| KC114 | TD     | 0           | 1                    | 0            | 0                    | 0       | 0               | 0             | 0         | 0                                   | 0                     | 0                                  | 1     |
| KC119 | TD     | 0           | 1                    | 0            | 1                    | 0       | 0               | 0             | 0         | 0                                   | 0                     | 0                                  | 2     |
| KC123 | TD     | 0           | 1                    | 0            | 0                    | 0       | 0               | 0             | 0         | 0                                   | 1                     | 0                                  | 2     |
| KC127 | TD     | 0           | 1                    | 0            | 0                    | 0       | 0               | 0             | 1         | 0                                   | 0                     | 0                                  | 2     |

**Supplemental Material S1.** Presence of childhood apraxia of speech (CAS) features for individual participants.

| ID    | Group | Vowel error | Consonant distortion | Stress error | Syllable segregation | Groping | Intrusive schwa | Voicing error | Slow rate | Difficulty with multisyllabic words | Resonance disturbance | Difficulty initiating articulation | Total |
|-------|-------|-------------|----------------------|--------------|----------------------|---------|-----------------|---------------|-----------|-------------------------------------|-----------------------|------------------------------------|-------|
| KC140 | TD    | 0           | 1                    | 0            | 0                    | 0       | 0               | 0             | 0         | 0                                   | 0                     | 0                                  | 1     |
| GP016 | SD    | 0           | 1                    | 0            | 0                    | 0       | 1               | 0             | 0         | 0                                   | 0                     | 0                                  | 2     |
| GP023 | SD    | 0           | 1                    | 0            | 0                    | 0       | 0               | 1             | 0         | 0                                   | 0                     | 0                                  | 2     |
| GP024 | SD    | 0           | 1                    | 0            | 1                    | 0       | 0               | 0             | 0         | 0                                   | 0                     | 0                                  | 2     |
| GP063 | SD    | 1           | 1                    | 0            | 0                    | 0       | 1               | 0             | 1         | 0                                   | 0                     | 0                                  | 4     |
| GP068 | SD    | 0           | 1                    | 0            | 0                    | 0       | 0               | 1             | 0         | 0                                   | 0                     | 0                                  | 2     |
| GP070 | SD    | 0           | 1                    | 0            | 1                    | 0       | 0               | 0             | 0         | 0                                   | 0                     | 0                                  | 2     |
| GP072 | SD    | 0           | 1                    | 0            | 0                    | 0       | 1               | 0             | 1         | 0                                   | 0                     | 0                                  | 3     |
| GP079 | SD    | 0           | 1                    | 0            | 0                    | 0       | 0               | 1             | 0         | 0                                   | 1                     | 1                                  | 4     |
| KC108 | SD    | 0           | 1                    | 0            | 0                    | 0       | 0               | 0             | 0         | 0                                   | 0                     | 0                                  | 1     |
| KC139 | SD    | 0           | 1                    | 0            | 0                    | 0       | 1               | 0             | 0         | 0                                   | 0                     | 0                                  | 2     |
| KC142 | SD    | 0           | 1                    | 0            | 0                    | 0       | 0               | 0             | 0         | 1                                   | 0                     | 0                                  | 2     |
| KC154 | SD    | 0           | 1                    | 0            | 0                    | 0       | 0               | 0             | 0         | 0                                   | 0                     | 0                                  | 1     |

*Note.* 1 = feature was present; 0 = feature was absent; CAS = children with CAS without language impairment; XAS+LI = children with CAS with language impairment; LI = children with language impairment; SD = children with speech delay; TD = typically developing children.
